# Supplementary material
Source: HighWire-hosted journal article supplement (https://bjsm.bmj.com/content/51/14/1073)
Supplement: inline-supplementary-material-1 [file inline-supplementary-material-1.pdf]

# The OSTRC Shoulder Injury Prevention Programme

The programme consist of five exercises completed three times per week during the warm-up, prior to throwing activity. The five exercises change every six weeks.

At start-up, follow the recommended load and number of repetitions.

Progress by increasing the number of repetitions, change to a stiffer elastic band or use a small weight or weight ball as external resistance.

Reduce load and seek medical attention if you experience shoulder pain during the exercises.

EXERCISE 1

Week 1-6

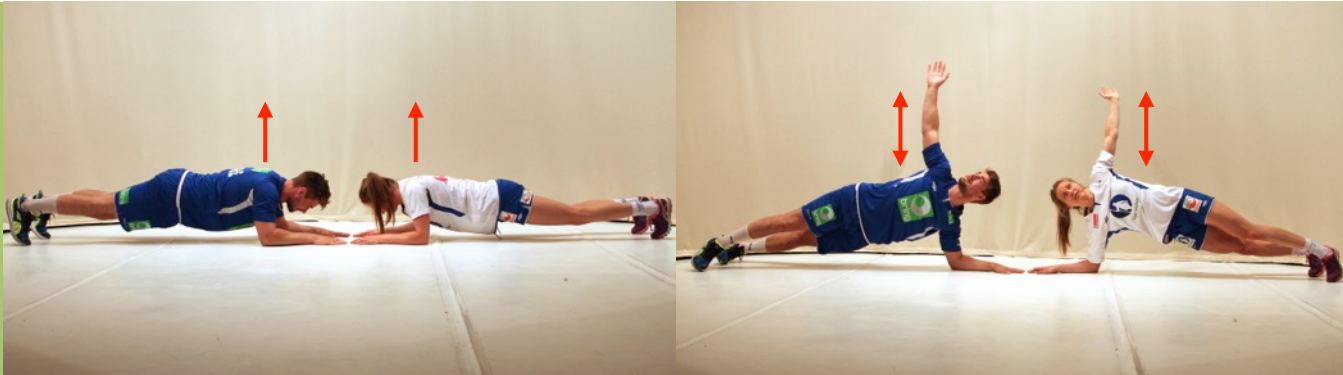

Trunk rotation  
Push-up plus position\* on elbows  
Alternating trunk rotation  
**3 x 8-16 reps**

Week 7-12

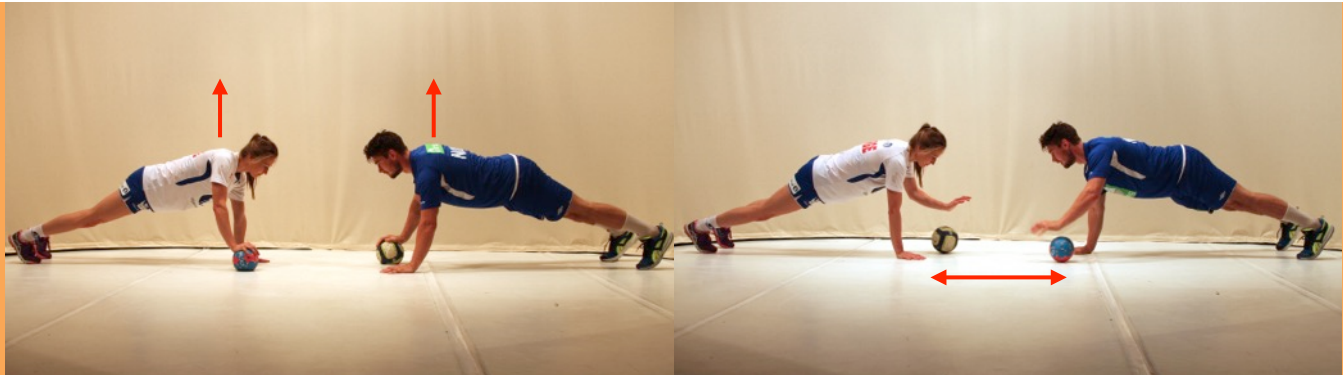

Plank with passing  
Pair exercise  
Push-up plus position\*  
Players roll ball to each other  
Alternating hands  
**3 x 8-16 reps**

Week 13-18

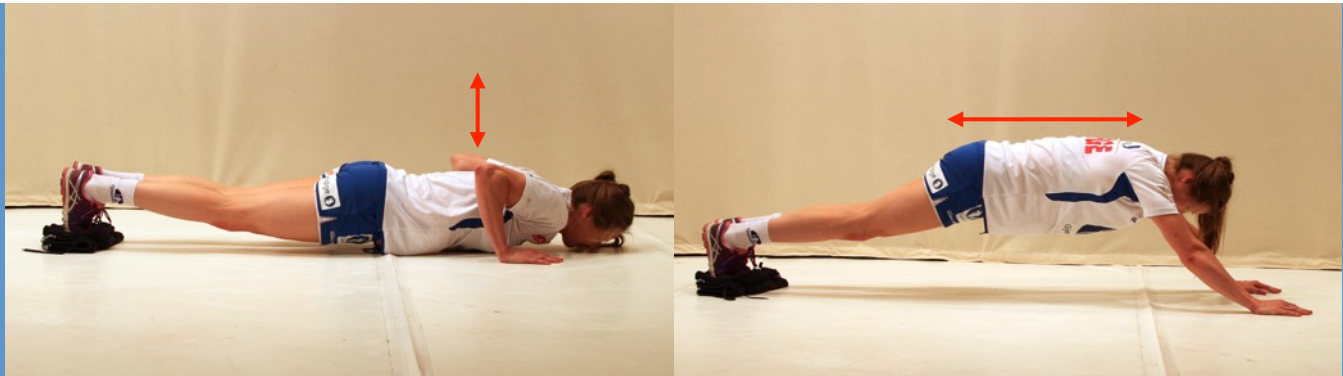

Push-up plus with backward slide  
Push-up plus\*  
Slide backwards  
Maintain neutral spine  
Return to start position  
**3 x 8-16 reps**

After week 18: choose between the different variations

\* The push-up plus position is achieved by pushing hands/elbows towards the floor by pushing your shoulder blades forward and out.

Week 1-6

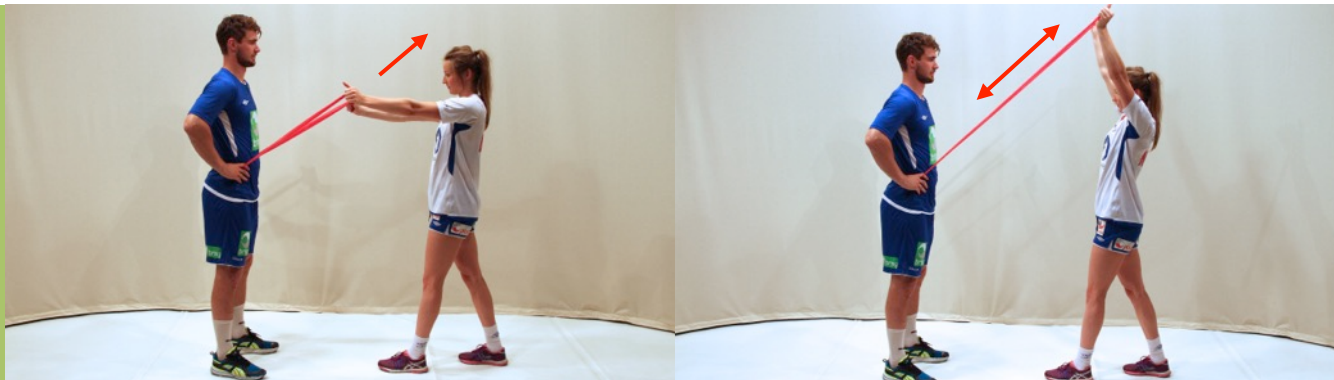

Standing Y-flies\*

Pair exercise  
Lift chest, draw shoulders back/down  
Pull the elastic with straight arms  
towards the ceiling in a Y-position

**3 x 8-16 reps**

EXERCISE 2

Week 7-12

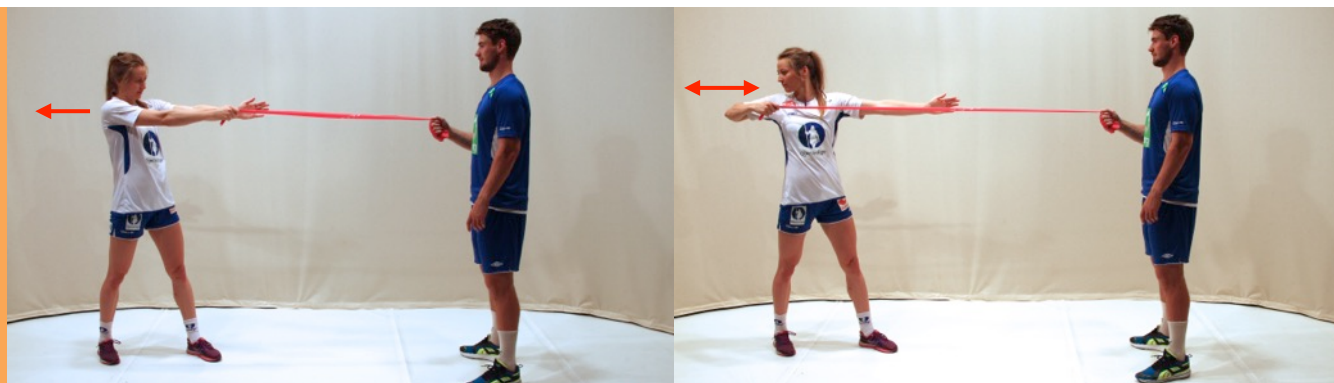

Bow and arrow\*

Pair exercise  
Start by drawing shoulder back/down  
Follow through with arm and trunk  
rotation

**3 x 8-16 reps**

Week 13-18

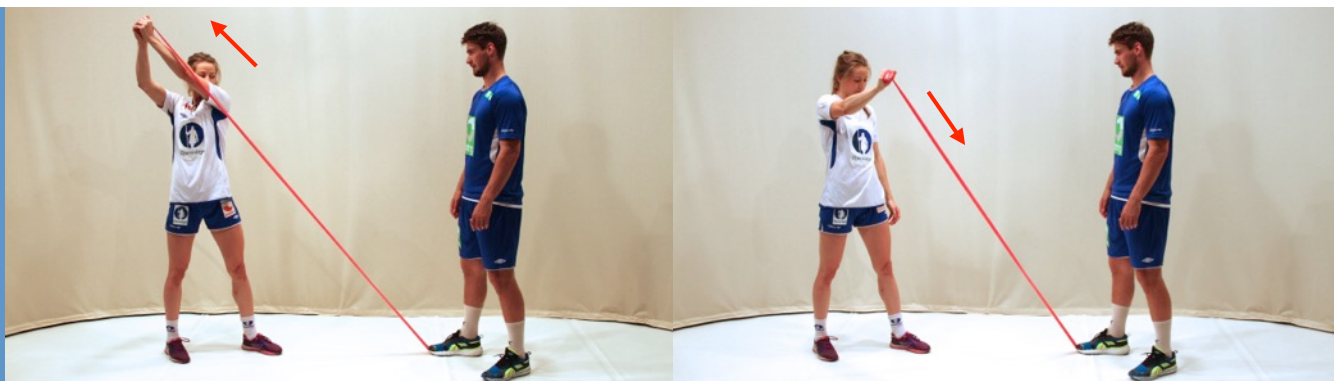

Slow arm lowering\*

Pair exercise  
Tighten elastic with 2 hands to maximum  
throwing position  
Return slowly with one hand (3 seconds)

**3 x 8-16 reps**

After week 18: choose between the different variations

\* Pre-position your shoulders before starting the exercise by lifting your chest and pulling your shoulder blades slightly back and down



Week 1-6

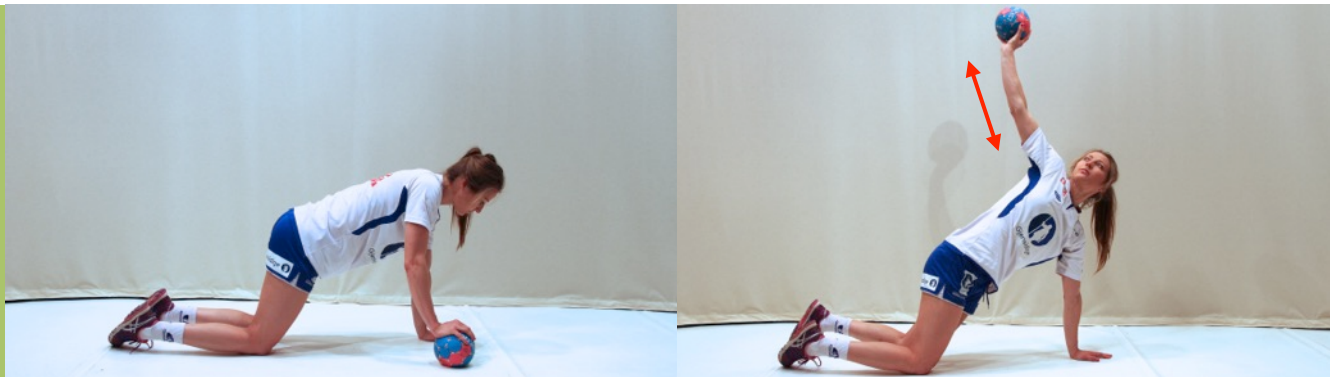

Trunk rotation

Alternating trunk rotation  
Point hand towards ceiling

3 x 8-16 reps

EXERCISE 3

Week 7-12

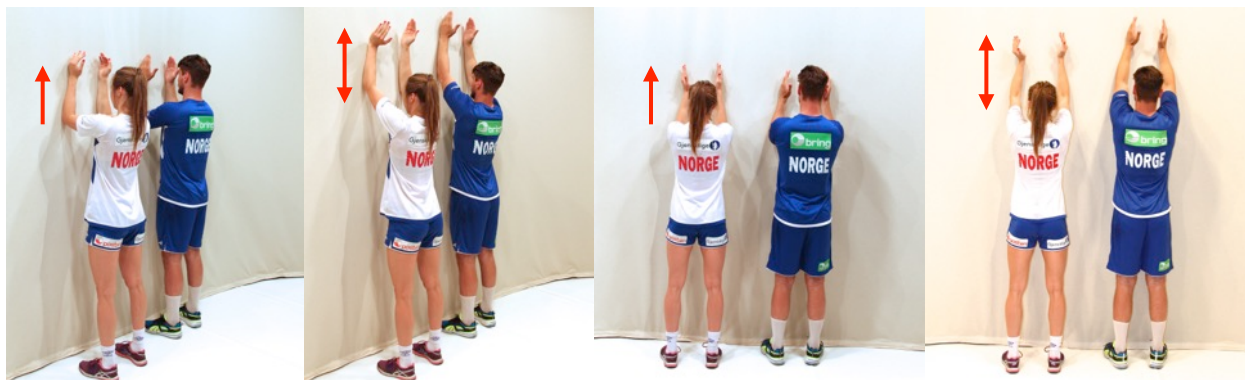

Dynamic latissimus dorsi stretch

Stand with elbows against wall  
Slide arms upwards  
Keep forearms vertical  
Maintain neutral spine

3 x 8-16 reps

Week 13-18

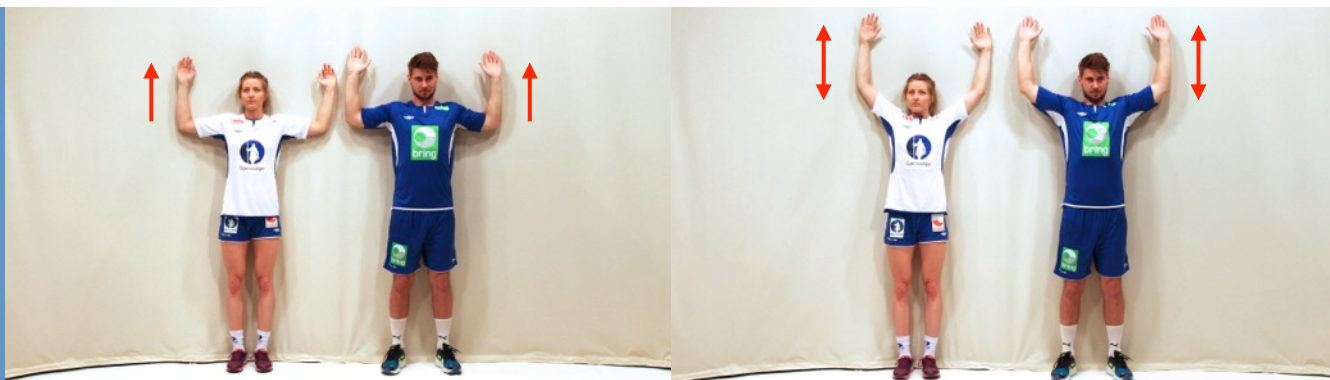

Dynamic W-stretch

Slide arms upwards  
Keep forearms, head and spine  
against wall

3 x 8-16 reps

After week 18: choose between the different variations

EXERCISE 4

Week 1-6 / 13-18

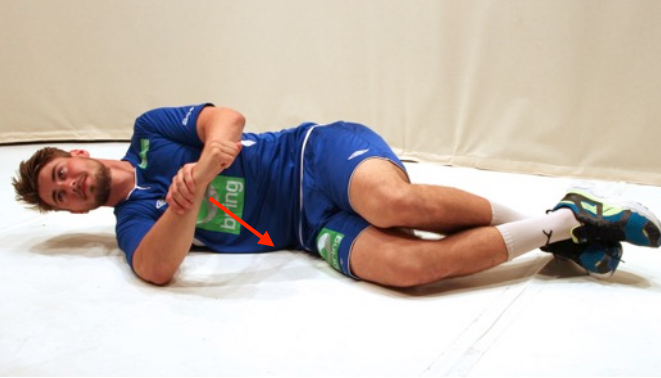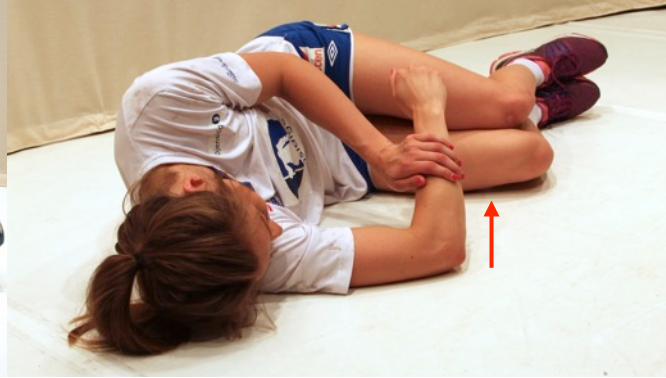

Sleeper stretch

Lie on your shoulder blade to stabilise it  
Keep shoulder slightly under 90°  
Push hand downwards towards floor  
(internal rotation)

**3 x 30 seconds**

Week 7-12 / 18-24

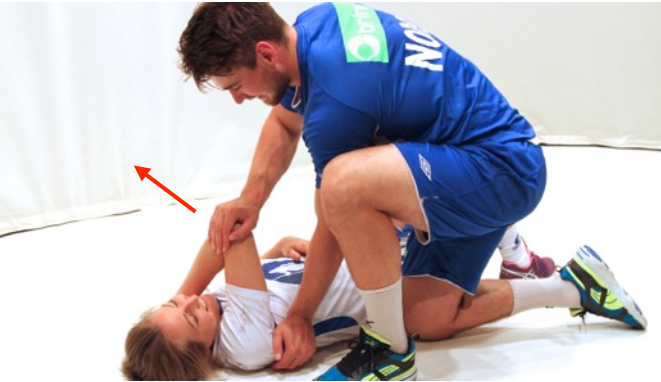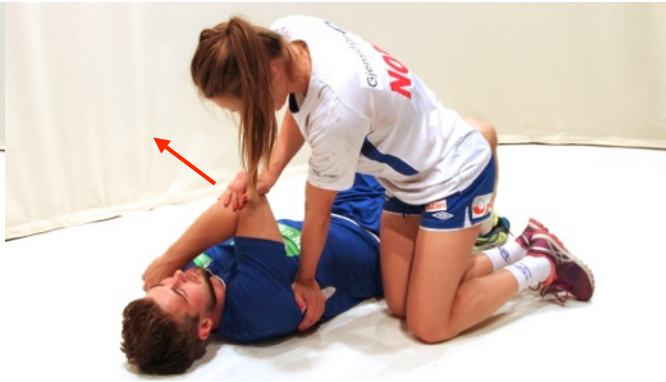

Cross-body stretch

Pair exercise  
Keep shoulder slightly under 90°  
Partner stretch the elbow across body  
and prevents shoulder blade from  
moving

**3 x 30 seconds**

After week 24: choose between the two variations

Week 1-6

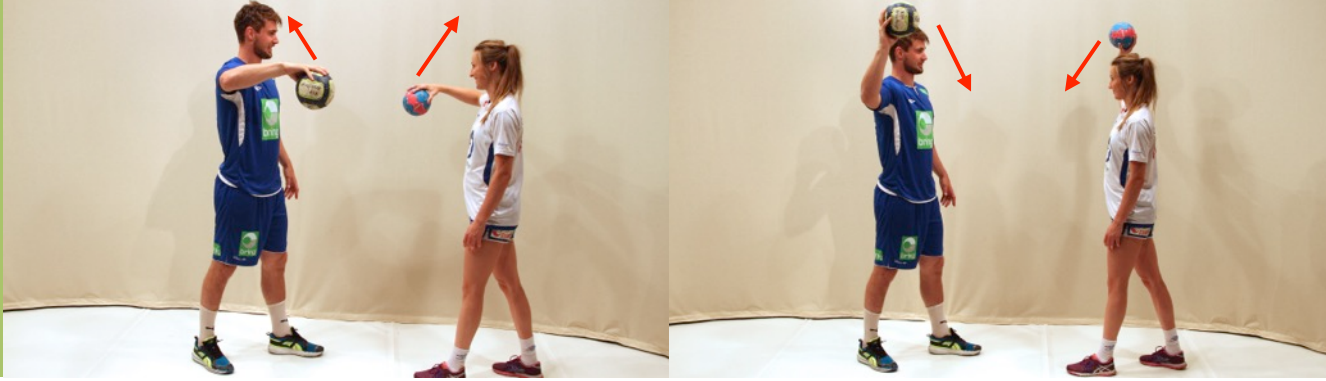

External rotation\*

Keep the elbow and shoulder in 90°  
Use a ball or small weight as resistance

**3 x 10-20 reps**

EXERCISE 5

Week 7-12

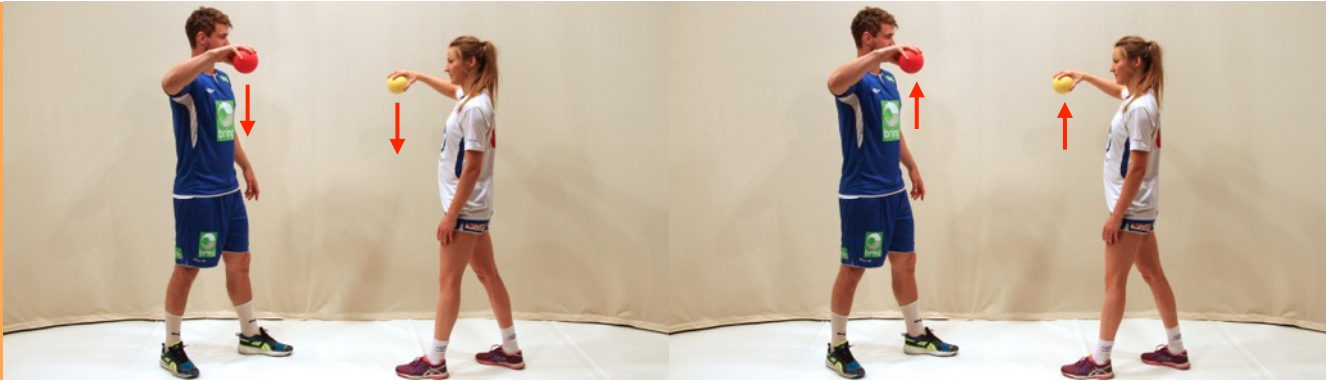

Drop and catch\*

Keep the elbow and shoulder in 90°  
Drop the ball and catch it quickly  
Return to start position  
Use a ball or small weight as resistance

**3 x 10-20 reps**

Week 13-18

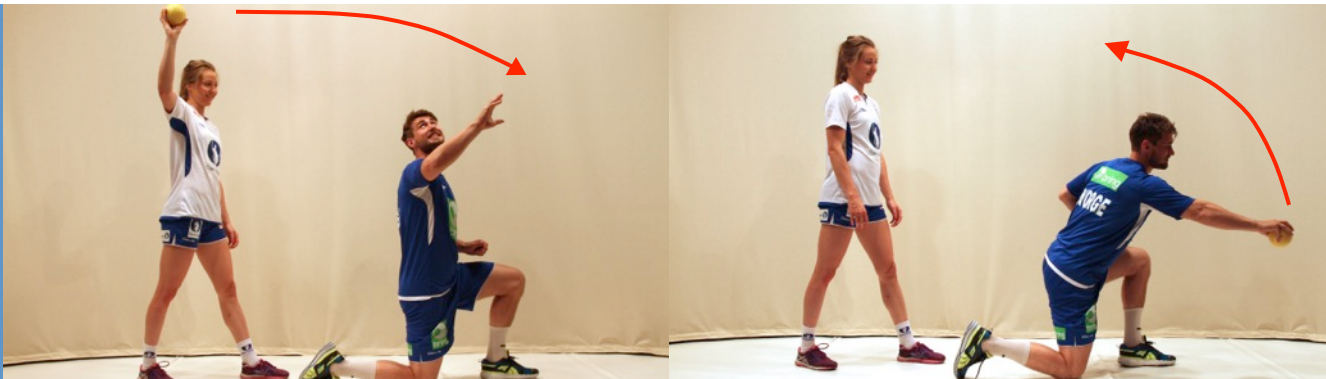

Backwards throw\*

Pair exercise  
Partner throws a ball from behind  
Catch the ball and throw it back using  
backwards rotation of the shoulder  
Progress by using a weighted ball

**3 x 10-20 reps**

After week 18: choose between the different variations

\* Pre-position your shoulders before starting the exercise by lifting your chest and pulling your shoulder blades slightly back and down
